# Supplementary figures and images for: Energetics and genetics across the prokaryote-eukaryote divide
Source: Springer Nature journal article supplement (doi:10.1186/1745-6150-6-35), 2011-01-01

(a)

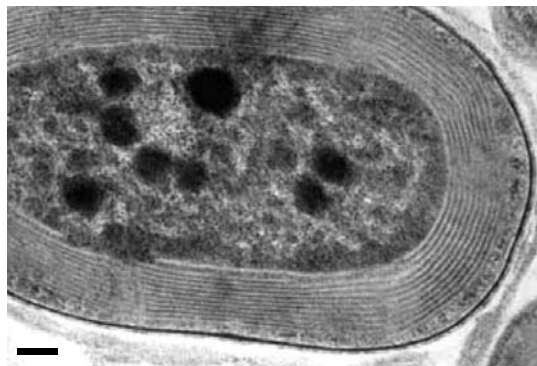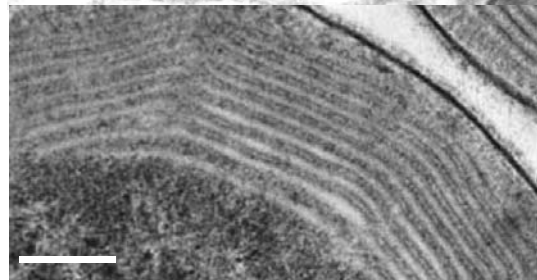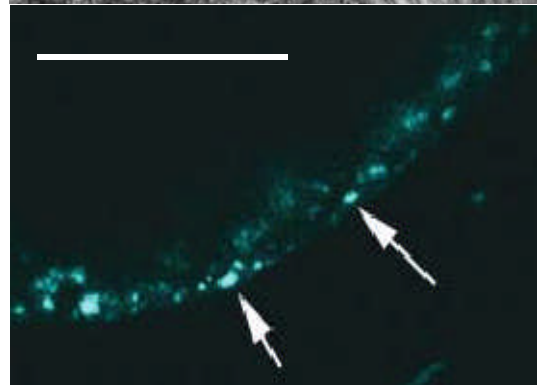

(c)

(b)

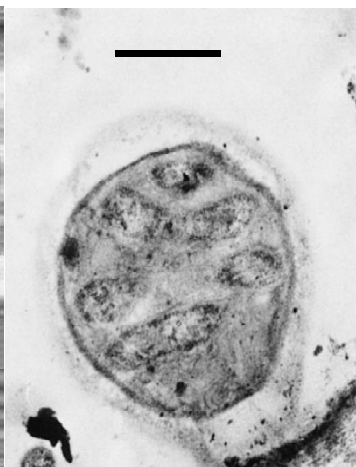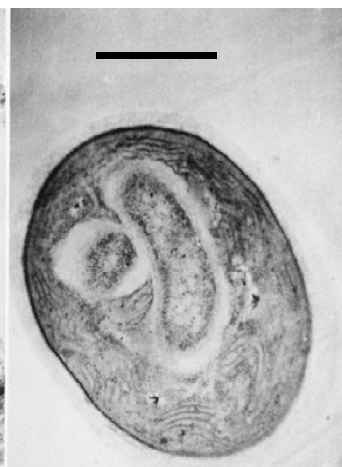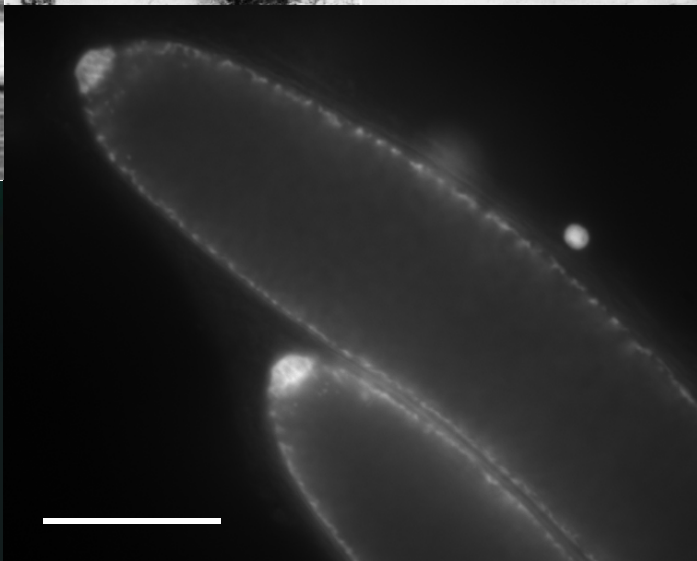

(d)

Supplement: 13062_2011_284_MOESM1_ESM.pdf [file 13062_2011_284_MOESM1_ESM.pdf]

(a)

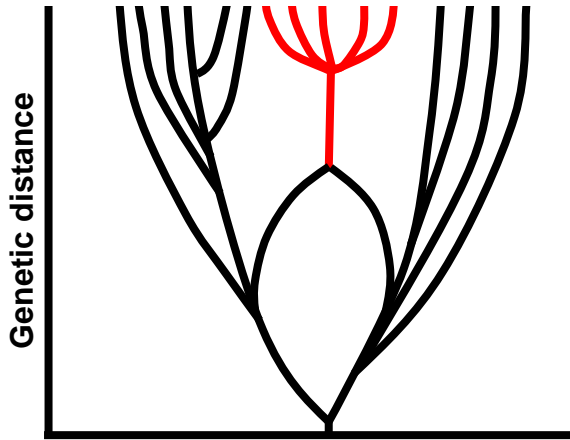

(b)

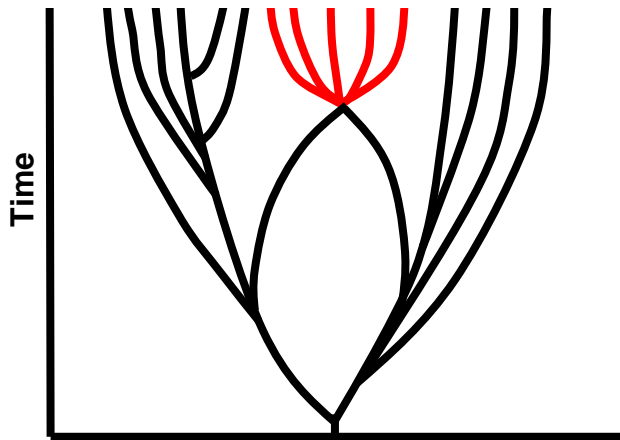

Supplement: 13062_2011_284_MOESM2_ESM.pdf [file 13062_2011_284_MOESM2_ESM.pdf]

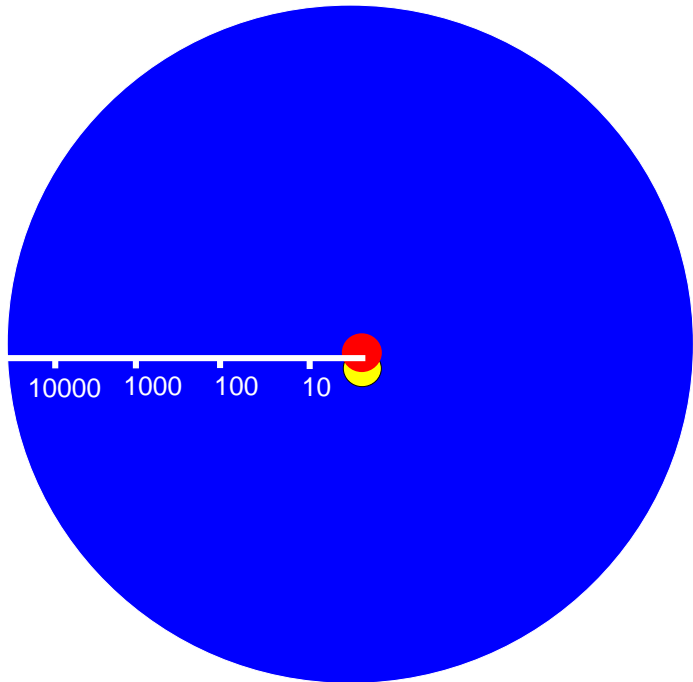

10000

1000

100

10

Supplement: 13062_2011_284_MOESM4_ESM.pdf [file 13062_2011_284_MOESM4_ESM.pdf]
